# Supplementary material for: A Hybrid Model for Achieving Universal Safe Drinking Water in the Medium-Sized City of Bangangté (Cameroon)
Source: MDPI journal article supplement (doi:10.3390/w13223177), 2021-11-10
Supplement: s1 [file s1]

# Summary of Information on the History of Water supply in Bangangté (in French)

Voici les informations que nous avons obtenues.

Il n'y aurait définitivement pas d'archives à la commune de Bangangté à ce sujet.

**Informateur 1:** Donkou Noubactep (56 ans, Cape Town / Afrique du Sud, natif de la ville)

La mission Sagnam (Eglise Evangélique, Collège Thomas Noutong avec internat mixte) avait un point de captage à Feumbat vers l'actuel Lycée Bilingue. Jusqu'à ce jour au quartier 3 (Groupe 4) les gens puisent de cette eau.

Concernant Nfeutom (Eglise Evangélique, CETIF avec internat de filles), il y avait aussi une source vers l'Etang Ministre Keutcha. L'approvisionnement était renforcée par la collecte des eaux de pluie traitées et stockées dans le château qui surplombe l'ancien internat des jeunes filles, aujourd'hui transformé en centre hospitalier (Petit Bangwa).

La source de Sagnam (Colline) a aussi servie de ravitaillement des quartiers périphériques. Le quartier administratif aurait aussi été alimenté par Feumbat avec cinq fontaines publiques: une au Groupe 1, une au camp militaire, une au Marché A, une à la jonction du domicile du Maire Nana et l'axe Hopital Mfeutom, et une au Carrefour du lycée. C'était des fontaines à manivelle.

La mission catholique avait une source au bas-fond. Quand j'étais au Collège Saint Jean Baptiste, nous nous y abbrevions quand nous faisions des briques de terre pendant les séances de travail manuel (TM).

Parlant des sources nous pouvons aussi mentionner celle de la forêt sacrée de Bangos. Il s'agit de la forêt sacrée sur le raccourci pour aller au Lycée, en aval du domicile Monsieur Tchankam Marcel (Prof. De Mathématiques au Lycée de Bangangté).

**Informateur 2: Informations collectées par Monsieur le Proviseur du Lycée Classique de Bangangté**

Il y avait des Européens à Mfetoum. Ils avaient un groupe électrogène qui produisait la lumière et permettait le pompage de l'eau. A partir de là on canalisait l'eau jusqu'au camp militaire. Au camp on stoquait l'eau dans des réservoirs souterrains ("puits"). Au moment de l'emploi, l'eau du puits était tirée par une manivelle. Une canalisation transférait l'eau de Mfetoum au camp militaire. Après le départ des Européens, le système a arrêté de fonctionner par manque d'entretien (maintenance).

**Remarque:** La différence d'altitude entre Mfetoum et le camp militaire semble ne pas favoriser le transport d'eau par gravité. Le premier informateur pense que l'eau du centre administratif, comme celui de l'hôpital (et de Sagnam), venait de la même source de Feumbat, la gravité favorise cette version. La source de Feumbat avait déjà été protégée par les Allemands, c'est à dire avant 1914.

Il y avait une source au Quartier 3 (Feumbat), une autre à Noutong sortant du sol (elle existe jusqu'aujourd'hui). Les deux sources se déversaient dans le château du marécage créé par l'hôpital. Tous les fonctionnaires et seulement eux puisaient l'eau à l'hôpital. Pour le reste de la population, une petite source dans les "écaluptus" au camp policier actuel.

Personne ressource: FONDJA Jacques (s/c M. Proviseur). Il a 61 ans, mais il a surtout travaillé avec deux personnes plus âgées (70 à 80 ans). Il est le porte parole qui s'exprime mieux en français.

Papa FONDJA donne une information très importante, elle semble précédée le temps des bornes fontaines publiques du premier informateur. Il faudra donc voir sur le terrain et dans les archives ce qui se faisait avant l'installation des 5 bornes fontaines et quand les bornes fontaines ont été installées.

Il me semble qu'il y avait entre le marécage (Keubaseu. Chez Ta'a Pang) et l'hôpital une canalisation, avec des fois cassures de tuyaux. Quelqu'un a-t-il plus nets souvenirs? Ou pouvait se trouver le château (réservoir, plutôt) dont parle Papa FONDJA, à Keubaseu?

### **Informateur 3: Anonyme sur les fora**

La mission catholique, le Collège Saint Jean Baptiste et le dispensaire *Ad Lucem* avaient leur eau d'une source protégée en contrebas du viaduc. Il y a encore dans cette vallée cette source, relativement peu connue, image disponible (voir l'article).

### **Informateur 4: Professeur Njanko Théophile (54 ans, Université de Dschang, natif de la ville)**

Ce que le pourrais donner comme information par rapport au ravitaillement d'une partie du quartier 4, du quartier Golgotha et le quartier juste derrière le Groupe 2. Il y avait une source derrière la maison de M. Louvoi Tchapda (regretté de mémoire) qui était Secrétaire au Lycée de Bangangté en notre temps. Cette source a été aménagée par la suite avec construction d'une borne fontaine. On y accède soit par Mfetom, soit par une piste derrière l'Ecole Groupe 2. Je ne saurais dire si elle est restée fonctionnelle jusqu'à présent.

Il y avait aussi une source au quartier Bongos. J'étais tout petit lorsque j'y allais avec mes grands frères (du Carrefour Lycée, NDLR).
